# Supplementary material for: Population-specific facial traits and diagnosis accuracy of genetic and rare diseases in an admixed Colombian population
Source: Research Square preprint supplement (doi:10.21203/rs.3.rs-2363873/v1), 2022-12-20
Supplement: Supplementary file 1 [file 822843ffe26a31b2abb7703c.docx]

**Population-specific facial traits and diagnosis accuracy of genetic and rare diseases in an admixed Colombian population**

Luis Miguel Echeverry, Estephania Candelo, Eidith Gómez, Paula Solís, Diana Ramírez, Diana Ortiz, Alejandro González, Xavier Sevillano, Juan Carlos Cuéllar, Harry Pachajoa, Neus Martínez-Abadías

**SUPPLEMENTARY INFORMATION**

**Supplementary Table 1.** Anatomical definition of facial landmarks used in morphometric and statistical analyses to quantify dysmorphologies associated to genetic and rare disorders.

| **Landmark** | **Anatomical Position** |
| --- | --- |
| 1 | Glabella: midpoint between the eyebrows on the median plane |
| 2 | Sellion: deepest point of the nasal root |
| 3 | Pronasale: most anterior point of the nose tip |
| 4 | Subnasale: point where the nasal septum meets the philtrum |
| 5 | Labiale Superius: midpoint of the vermilion seam of the upper lip |
| 6 | Labiale Inferius: midpoint of the vermilion seam of the lower lip |
| 7 | Endocathion R: point in the internal lateral commissure of the right eye |
| 8 | Endocathion L: point in the internal lateral commissure of the left eye |
| 9 | Palpebrale inferius R: most inferior medial point of the lower right eyelid |
| 10 | Exocanthion R: point in the external lateral commissure of the right eye |
| 11 | Palpebrale inferius L: most inferior medial point of the lower left eyelid |
| 12 | Exocanthion L: point in the external lateral commissure of the left eye |
| 13 | Subalare R: the facial insertion of the right alar base |
| 14 | Subalare L: the facial insertion of the left alar base |
| 15 | Chelion R: point located in the right labial commissure |
| 16 | Crista philtra R: crossing of the vermilion line and elevated margin of the right philtrum |
| 17 | Crista philtra L: crossing of the vermilion line and elevated margin of the left philtrum |
| 18 | Chelion L: point located in the left labial commissure |
